# Supplementary material for: Optical Coherence Tomography Artifacts Are Associated With Adaptive Optics Scanning Light Ophthalmoscopy Success in Achromatopsia
Source: PubMed Central journal article supplement (PMC7804582; doi:10.1167/tvst.10.1.11), 2021-01-07
Supplement: tvst-10-1-11_s003.pdf [file tvst-10-1-11_s003.pdf]

**Supplementary Table S1. Subject demographics and data**

| <b>Subject ID</b> | <b>Genotype</b> | <b>Gender</b> | <b>Age (years)</b> | <b>Eye</b> | <b>AOSLO Success</b> | <b>OCT Artifact Severity Category</b> |
|-------------------|-----------------|---------------|--------------------|------------|----------------------|---------------------------------------|
| JC_0047*          | <i>CNGB3</i>    | M             | 18                 | OD         | Y                    | 1                                     |
| JC_10028          | <i>CNGB3</i>    | F             | 13                 | OD         | Y                    | 1                                     |
| JC_10069          | <i>CNGA3</i>    | M             | 18                 | OD         | Y                    | 1                                     |
| JC_10167          | <i>CNGB3</i>    | F             | 17                 | OD         | Y                    | 1                                     |
| JC_10196          | <i>CNGB3</i>    | F             | 34                 | OD         | Y                    | 1                                     |
| JC_10197          | <i>CNGB3</i>    | F             | 9                  | OD         | Y                    | 1                                     |
| JC_10216          | <i>CNGB3</i>    | M             | 17                 | OD         | Y                    | 1                                     |
| JC_10224          | <i>CNGB3</i>    | M             | 38                 | OD         | Y                    | 1                                     |
| JC_10232          | <i>CNGB3</i>    | M             | 19                 | OD         | Y                    | 1                                     |
| JC_10247          | <i>CNGB3</i>    | M             | 25                 | OD         | Y                    | 1                                     |
| JC_10260          | <i>CNGB3</i>    | M             | 31                 | OD         | Y                    | 1                                     |
| JC_10335          | <i>CNGB3</i>    | F             | 18                 | OD         | Y                    | 1                                     |
| JC_10409          | <i>CNGB3</i>    | F             | 32                 | OD         | Y                    | 1                                     |
| JC_10417          | <i>CNGB3</i>    | F             | 23                 | OS         | Y                    | 1                                     |
| JC_10853          | <i>CNGB3</i>    | F             | 28                 | OD         | Y                    | 1                                     |
| JC_10854          | <i>CNGB3</i>    | M             | 32                 | OD         | Y                    | 1                                     |
| JC_11067          | <i>CNGA3</i>    | M             | 24                 | OD         | Y                    | 1                                     |
| JC_11155          | <i>CNGA3</i>    | F             | 31                 | OD         | Y                    | 1                                     |
| JC_11228          | <i>CNGA3</i>    | F             | 29                 | OD         | Y                    | 1                                     |
| JC_1208           | <i>CNGB3</i>    | M             | 18                 | OD         | Y                    | 1                                     |
| JC_11034          | <i>CNGB3</i>    | F             | 46                 | OD         | Y                    | 1                                     |
| JC_11066          | <i>CNGA3</i>    | F             | 11                 | OD         | Y                    | 1                                     |
| JC_10198          | <i>CNGB3</i>    | F             | 44                 | OD         | N                    | 1                                     |
| JC_10213          | <i>CNGB3</i>    | M             | 12                 | OD         | N                    | 1                                     |
| JC_10215*         | <i>CNGB3</i>    | M             | 14                 | OD         | N                    | 1                                     |
| JC_10217          | <i>CNGB3</i>    | F             | 8                  | OD         | N                    | 1                                     |
| JC_10249          | <i>CNGB3</i>    | M             | 16                 | OD         | N                    | 1                                     |
| JC_10258          | <i>CNGB3</i>    | F             | 43                 | OD         | N                    | 1                                     |
| JC_10334          | <i>CNGB3</i>    | M             | 22                 | OD         | N                    | 1                                     |
| JC_10617          | <i>CNGA3</i>    | M             | 15                 | OD         | N                    | 1                                     |
| JC_11296          | <i>CNGA3</i>    | M             | 12                 | OD         | N                    | 1                                     |
| JC_11579          | <i>CNGB3</i>    | M             | 9                  | OD         | N                    | 1                                     |
| JC_11623          | <i>CNGA3</i>    | M             | 15                 | OD         | N                    | 1                                     |
| KS_11531          | <i>CNGB3</i>    | M             | 24                 | OD         | N                    | 1                                     |
| JC_10151          | <i>CNGB3</i>    | F             | 11                 | OD         | Y                    | 2                                     |

|           |       |   |    |    |   |   |
|-----------|-------|---|----|----|---|---|
| JC_10191* | CNGB3 | M | 36 | OD | Y | 2 |
| JC_10248  | CNGB3 | F | 16 | OD | Y | 2 |
| JC_10310  | CNGB3 | M | 33 | OD | Y | 2 |
| JC_10416  | CNGB3 | F | 30 | OS | Y | 2 |
| JC_10424  | CNGB3 | M | 27 | OD | Y | 2 |
| JC_11062  | CNGA3 | F | 41 | OD | Y | 2 |
| KS_10337  | CNGA3 | F | 17 | OD | Y | 2 |
| JC_10142  | CNGB3 | F | 45 | OD | N | 2 |
| JC_10195  | CNGB3 | M | 9  | OD | N | 2 |
| JC_10214  | CNGB3 | M | 10 | OD | N | 2 |
| JC_10300* | CNGB3 | M | 9  | OD | N | 2 |
| JC_10968  | CNGB3 | M | 43 | OD | N | 2 |
| JC_10999  | CNGB3 | F | 10 | OD | N | 2 |
| JC_11060  | CNGA3 | F | 57 | OD | N | 2 |
| JC_11401  | CNGA3 | M | 24 | OD | N | 2 |
| JC_10024  | CNGB3 | M | 28 | OD | N | 2 |
| JC_10089* | CNGB3 | F | 40 | OD | Y | 3 |
| JC_10025  | CNGB3 | M | 19 | OD | N | 3 |
| JC_10168  | CNGB3 | F | 10 | OD | N | 3 |
| JC_10250  | CNGB3 | M | 18 | OD | N | 3 |
| JC_10257* | CNGB3 | M | 14 | OD | N | 3 |
| JC_10490  | CNGB3 | F | 49 | OD | N | 3 |
| JC_10551  | CNGA3 | M | 10 | OS | N | 3 |
| JC_11036  | CNGB3 | F | 9  | OD | N | 3 |
| KS_11453  | CNGA3 | M | 18 | OD | N | 3 |
| JC_10256  | CNGB3 | F | 23 | OD | N | 4 |
| JC_10029  | CNGB3 | F | 12 | OD | N | 4 |
| JC_10953  | CNGB3 | M | 16 | OD | N | 4 |
| JC_11000  | CNGB3 | M | 18 | OD | N | 4 |
| JC_11061* | CNGB3 | F | 7  | OD | N | 4 |
| JC_11297  | CNGA3 | M | 12 | OD | N | 4 |

---

\*Subject included in Figure 3.

M=Male; F=Female
