# Supplementary material for: Optical Coherence Tomography Artifacts Are Associated With Adaptive Optics Scanning Light Ophthalmoscopy Success in Achromatopsia
Source: PubMed Central journal article supplement (PMC7804582; doi:10.1167/tvst.10.1.11), 2021-01-07
Supplement: tvst-10-1-11_s004.pdf [file tvst-10-1-11_s004.pdf]

**Supplementary Table S2. Previous reporting of ACHM subjects**

| <b>Subject ID in Current Study</b> | Dubis et al (2014) <sup>1</sup> | Scoles et al (2014) <sup>2</sup> | Abozaid et al (2016) <sup>3</sup> | Langlo et al (2016) <sup>4</sup> | Langlo et al (2017) <sup>5</sup> | Georgiou et al (2019) <sup>6</sup> | Mastey et al (2019) <sup>7</sup> | Mastey et al (2019) <sup>8</sup> | Litts et al (2020) <sup>9</sup> | Georgiou et al (2020) <sup>10</sup> |
|------------------------------------|---------------------------------|----------------------------------|-----------------------------------|----------------------------------|----------------------------------|------------------------------------|----------------------------------|----------------------------------|---------------------------------|-------------------------------------|
| JC_0047                            |                                 |                                  |                                   | PCI-007                          | PCI-007                          |                                    |                                  |                                  | same ID                         |                                     |
| JC_10028                           |                                 | same ID                          |                                   | PCI-004                          | PCI-004                          |                                    |                                  |                                  |                                 |                                     |
| JC_10069                           |                                 | same ID                          | same ID                           |                                  |                                  | same ID                            |                                  | same ID                          | same ID                         | same ID                             |
| JC_10167                           |                                 |                                  |                                   | BPE-003                          | BPE-003                          |                                    |                                  |                                  | same ID                         |                                     |
| JC_10196                           |                                 |                                  |                                   | UFC-002                          | UFC-002                          |                                    |                                  |                                  | same ID                         |                                     |
| JC_10197                           |                                 |                                  |                                   | UFC-004                          | UFC-004                          |                                    |                                  |                                  | same ID                         |                                     |
| JC_10216                           |                                 |                                  |                                   | PCI-013                          | PCI-013                          |                                    |                                  |                                  | same ID                         |                                     |
| JC_10224                           |                                 |                                  |                                   | PCI-021                          | PCI-021                          |                                    |                                  |                                  | same ID                         |                                     |
| JC_10232                           |                                 |                                  |                                   | CEI-001                          | CEI-001                          |                                    |                                  | same ID                          | same ID                         |                                     |
| JC_10247                           |                                 |                                  |                                   | UFC-001                          | UFC-001                          |                                    |                                  |                                  | same ID                         |                                     |
| JC_10260                           |                                 |                                  |                                   | CEI-006                          | CEI-006                          |                                    |                                  |                                  |                                 |                                     |
| JC_10335                           |                                 |                                  |                                   | PCI-025                          |                                  |                                    |                                  |                                  |                                 |                                     |
| JC_10409                           |                                 |                                  |                                   | PCI-031                          | PCI-031                          |                                    |                                  |                                  |                                 |                                     |
| JC_10417                           |                                 |                                  |                                   | BPE-019                          | BPE-019                          |                                    |                                  |                                  |                                 |                                     |
| JC_10853                           |                                 |                                  |                                   | PCI-032                          |                                  |                                    |                                  |                                  | same ID                         |                                     |
| JC_10854                           |                                 |                                  |                                   | PCI-033                          |                                  |                                    |                                  |                                  | same ID                         |                                     |
| JC_11067                           |                                 |                                  |                                   |                                  |                                  |                                    |                                  |                                  |                                 |                                     |
| JC_11155                           |                                 |                                  |                                   |                                  |                                  |                                    |                                  |                                  |                                 |                                     |
| JC_11228                           |                                 |                                  |                                   |                                  |                                  |                                    |                                  |                                  |                                 |                                     |
| JC_1208                            | same ID                         |                                  |                                   | PCI-009                          | PCI-009                          |                                    |                                  |                                  | same ID                         |                                     |
| JC_11034                           |                                 |                                  |                                   |                                  |                                  |                                    |                                  |                                  |                                 |                                     |
| JC_11066                           |                                 |                                  |                                   |                                  |                                  |                                    |                                  |                                  |                                 |                                     |
| JC_10198                           |                                 |                                  |                                   | UFC-003                          | UFC-003                          |                                    |                                  |                                  | same ID                         |                                     |
| JC_10213                           |                                 |                                  |                                   | CEI-004                          | CEI-004                          |                                    |                                  |                                  |                                 |                                     |
| JC_10215                           |                                 |                                  |                                   | CEI-005                          | CEI-005                          |                                    |                                  |                                  |                                 |                                     |
| JC_10217                           |                                 |                                  |                                   | PCI-012                          | PCI-012                          |                                    |                                  |                                  |                                 |                                     |
| JC_10249                           |                                 |                                  |                                   | UFC-009                          | UFC-009                          |                                    |                                  |                                  |                                 |                                     |
| JC_10258                           |                                 |                                  |                                   | PCI-024                          | PCI-024                          |                                    |                                  |                                  |                                 |                                     |

|          |         |         |         |         |          |
|----------|---------|---------|---------|---------|----------|
| JC_10334 |         | CEI-011 | CEI-011 |         |          |
| JC_10617 |         |         |         |         |          |
| JC_11296 |         |         |         |         |          |
| JC_11579 |         |         |         |         |          |
| JC_11623 |         |         |         |         |          |
| KS_11531 |         |         |         |         |          |
| JC_10151 |         | PCI-006 | PCI-006 |         | same ID  |
| JC_10191 |         | PCI-017 | PCI-017 |         | same ID  |
| JC_10248 |         | CEI-008 | CEI-008 |         | same ID  |
| JC_10310 |         | CEI-002 | CEI-002 |         | same ID  |
| JC_10416 |         | CEI-009 | CEI-009 |         |          |
| JC_10424 |         | PCI-020 | PCI-020 |         |          |
| JC_11062 |         |         |         |         | same ID* |
| KS_10337 |         |         |         | same ID | same ID  |
| JC_10142 |         | PCI-011 | PCI-011 |         |          |
| JC_10195 |         | UFC-006 | UFC-006 |         | same ID  |
| JC_10214 |         | PCI-019 |         |         |          |
| JC_10300 |         | BPE-018 | BPE-018 |         |          |
| JC_10968 |         | PCI-034 |         |         |          |
| JC_10999 |         |         |         |         | same ID* |
| JC_11060 |         |         |         |         |          |
| JC_11401 |         |         |         |         |          |
| JC_10024 |         | PCI-001 | PCI-001 |         | same ID  |
| JC_10089 | same ID | PCI-008 | PCI-008 | same ID | same ID  |
| JC_10025 |         | PCI-002 | PCI-002 |         |          |
| JC_10168 |         | CEI-003 | CEI-003 |         |          |
| JC_10250 |         | UFC-008 | UFC-008 |         |          |
| JC_10257 |         | UFC-005 | UFC-005 |         |          |
| JC_10490 |         |         |         |         |          |
| JC_10551 |         |         |         | same ID |          |
| JC_11036 |         |         |         |         |          |
| KS_11453 |         |         |         |         |          |

|          |         |         |
|----------|---------|---------|
| JC_10256 | UFC-007 | UFC-007 |
| JC_10029 | PCI-005 | PCI-005 |
| JC_10953 | CEI-016 |         |
| JC_11000 |         |         |
| JC_11061 |         |         |
| JC_11297 |         |         |

---

\*Unpublished at time of analysis

## References

1. Dubis AM, Cooper RF, Aboshiha J, et al. Genotype-dependent variability in residual cone structure in achromatopsia: towards developing metrics for assessing cone health. *Invest Ophthalmol Vis Sci* 2014;55:7303-7311.
2. Scoles D, Sulai YN, Langlo CS, et al. In vivo imaging of human cone photoreceptor inner segments. *Invest Ophthalmol Vis Sci* 2014;55:4244-4251.
3. Abozaid MA, Langlo CS, Dubis AM, Michaelides M, Tarima S, Carroll J. Reliability and repeatability of cone density measurements in patients with congenital achromatopsia. *Adv Exp Med Biol* 2016;854:277-283.
4. Langlo CS, Patterson EJ, Higgins BP, et al. Residual foveal cone structure in *CNGB3*-associated achromatopsia. *Invest Ophthalmol Vis Sci* 2016;57:3984-3995.
5. Langlo CS, Erker LR, Parker M, et al. Repeatability and longitudinal assessment of foveal cone structure in *CNGB3*-associated achromatopsia. *Retina* 2017;37:1956-1966.
6. Georgiou M, Litts KM, Kalitzeos A, et al. Adaptive optics retinal imaging in *CNGA3*-associated achromatopsia: Retinal characterization, interocular symmetry, and intrafamilial variability. *Invest Ophthalmol Vis Sci* 2019;60:383-396.
7. Mastey RR, Gaffney M, Litts KM, et al. Assessing the interocular symmetry of foveal outer nuclear layer thickness in achromatopsia. *Transl Vis Sci Technol* 2019;8:21.
8. Mastey RR, Georgiou M, Langlo CS, et al. Characterization of retinal structure in *ATF6*-associated achromatopsia. *Invest Ophthalmol Vis Sci* 2019;60:2631-2640.
9. Litts KM, Georgiou M, Langlo CS, et al. Interocular symmetry of foveal cone topography in congenital achromatopsia. *Curr Eye Res* 2020;45:1257-1264.
10. Georgiou M, Litts KM, Singh N, et al. Intraobserver repeatability and interobserver reproducibility of foveal cone density measurements in *CNGA3*- and *CNGB3*-achromatopsia. *Transl Vis Sci Technol* 2020;9:37.
